# Supplementary material
Source: PubMed Central journal article supplement (PMC6731371)
Supplement: mmc1.pdf [file mmc1.pdf]

**The American Journal of Human Genetics, Volume 105**

**Supplemental Data**

**Using Transcriptomic Hidden Variables**

**to Infer Context-Specific Genotype Effects in the Brain**

**Bernard Ng, William Casazza, Ellis Patrick, Shinya Tasaki, Gherman Novakovsky, Daniel Felsky, Yiyi Ma, David A. Bennett, Chris Gaiteri, Philip L. De Jager, and Sara Mostafavi**

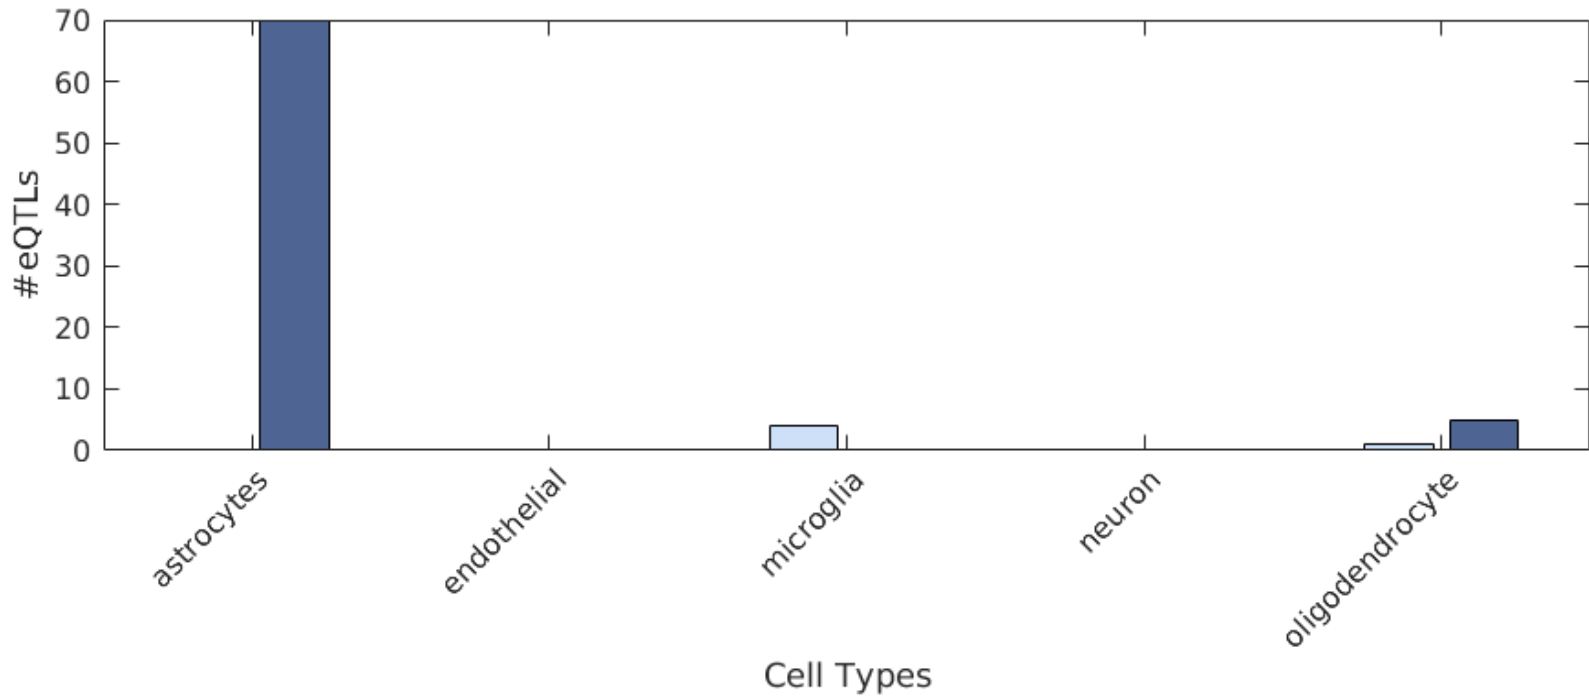

**Figure S1. Cell type specific eQTL analysis.** Using LVs corresponding to cell types (dark blue) detected 75 cell type specific eQTLs, whereas using single gene expression markers (light blue) only detected 5 cell type specific eQTLs at a dependent FDR of 0.1. The analysis was performed on the ROSMAP data only. Note that in the case of LVs, multiple testing correction was performed across all LVs, not just the cell type related ones. The increased detection rate suggests that using multiple genes to estimate cell type proportions as in the case of LVs might improve accuracy over using single gene markers.
